# Supplementary material
Source: MDPI journal article supplement (https://www.mdpi.com/2673-9992/14/1/119)
Supplement: s1 [file s1]

# Miconazole nanoemulsions for melanoma treatment: formulation development and droplet size and solubility studies

Joana Amado <sup>1,\*</sup>, Patrícia C. Pires <sup>1,2,3</sup>, Francisco Veiga <sup>1,2</sup> and Ana Cláudia Paiva-Santos <sup>1,2</sup>

<sup>1</sup> Faculty of Pharmacy (FFUC-UC), University of Coimbra, Azinhaga de Santa Comba, 3000-548 Coimbra, Portugal; <sup>2</sup> REQUIMTE/LAQV, Group of Pharmaceutical Technology, Faculty of Pharmacy, University of Coimbra, Coimbra, Portugal; <sup>3</sup> Health Sciences Research Centre (CICS-UBI), University of Beira Interior, Av. Infante D. Henrique, 6200-506 Covilhã, Portugal  
\*Correspondence: joana.verissimoamado@gmail.com; Tel.: 00351963954512

## Background

- **Melanoma** is one of the most dangerous skin cancers, with a high mortality rate and an incidence that has increased radically in the past few years. This has led to a huge demand for new more effective forms of treatment <sup>7,8,11</sup>.
- Miconazole has shown to **inhibit the growth of melanoma cells** <sup>2,5</sup>.

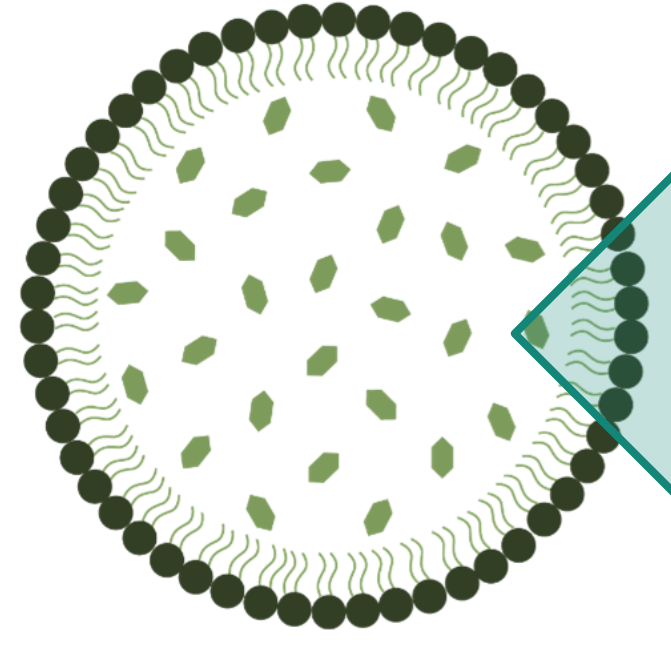

Nanoemulsions have been investigated as potential drug delivery vehicles to target cancer cells, since they are a promising alternative to increase the solubility and skin permeation and retention of hydrophobic drugs. <sup>3,4,7,9</sup>

## Purpose

The purpose of this work was to incorporate **miconazole**, a hydrophobic <sup>12</sup> antifungal drug with **potential anticancer activity** <sup>2,5</sup>, in an oil-in-water (O/W) nanoemulsion for topical administration for the treatment of melanoma.

## Results

- After phase 1 (nanoemulsion without miconazole), **2 out of the 17 nanoemulsions** had promising characteristics- PDI below 0.300 and droplet size between 100 and 200 nm.

**Nanoemulsions with higher %Transcutol® HP had a lower PDI**

- This is expected, since this excipient is used as a co-emulsifier. It is used to achieve a ultralow interfacial tension, and helps make the emulsion more fluid <sup>1,6</sup>.

**Nanoemulsions with high quantities of Kolliphor® RH 40 had a lower PDI**

- This is expected, since Kolliphor can reduce nanoemulsion droplet size, probably because of its chemical structure with a lot of polyethylene glycol groups and therefore higher hydrophilic. This is also expressed by the higher hydrophilic-lipophilic balance (HLB) value of Kolliphor (HLB = 14- 16). <sup>10</sup>

## Methodology

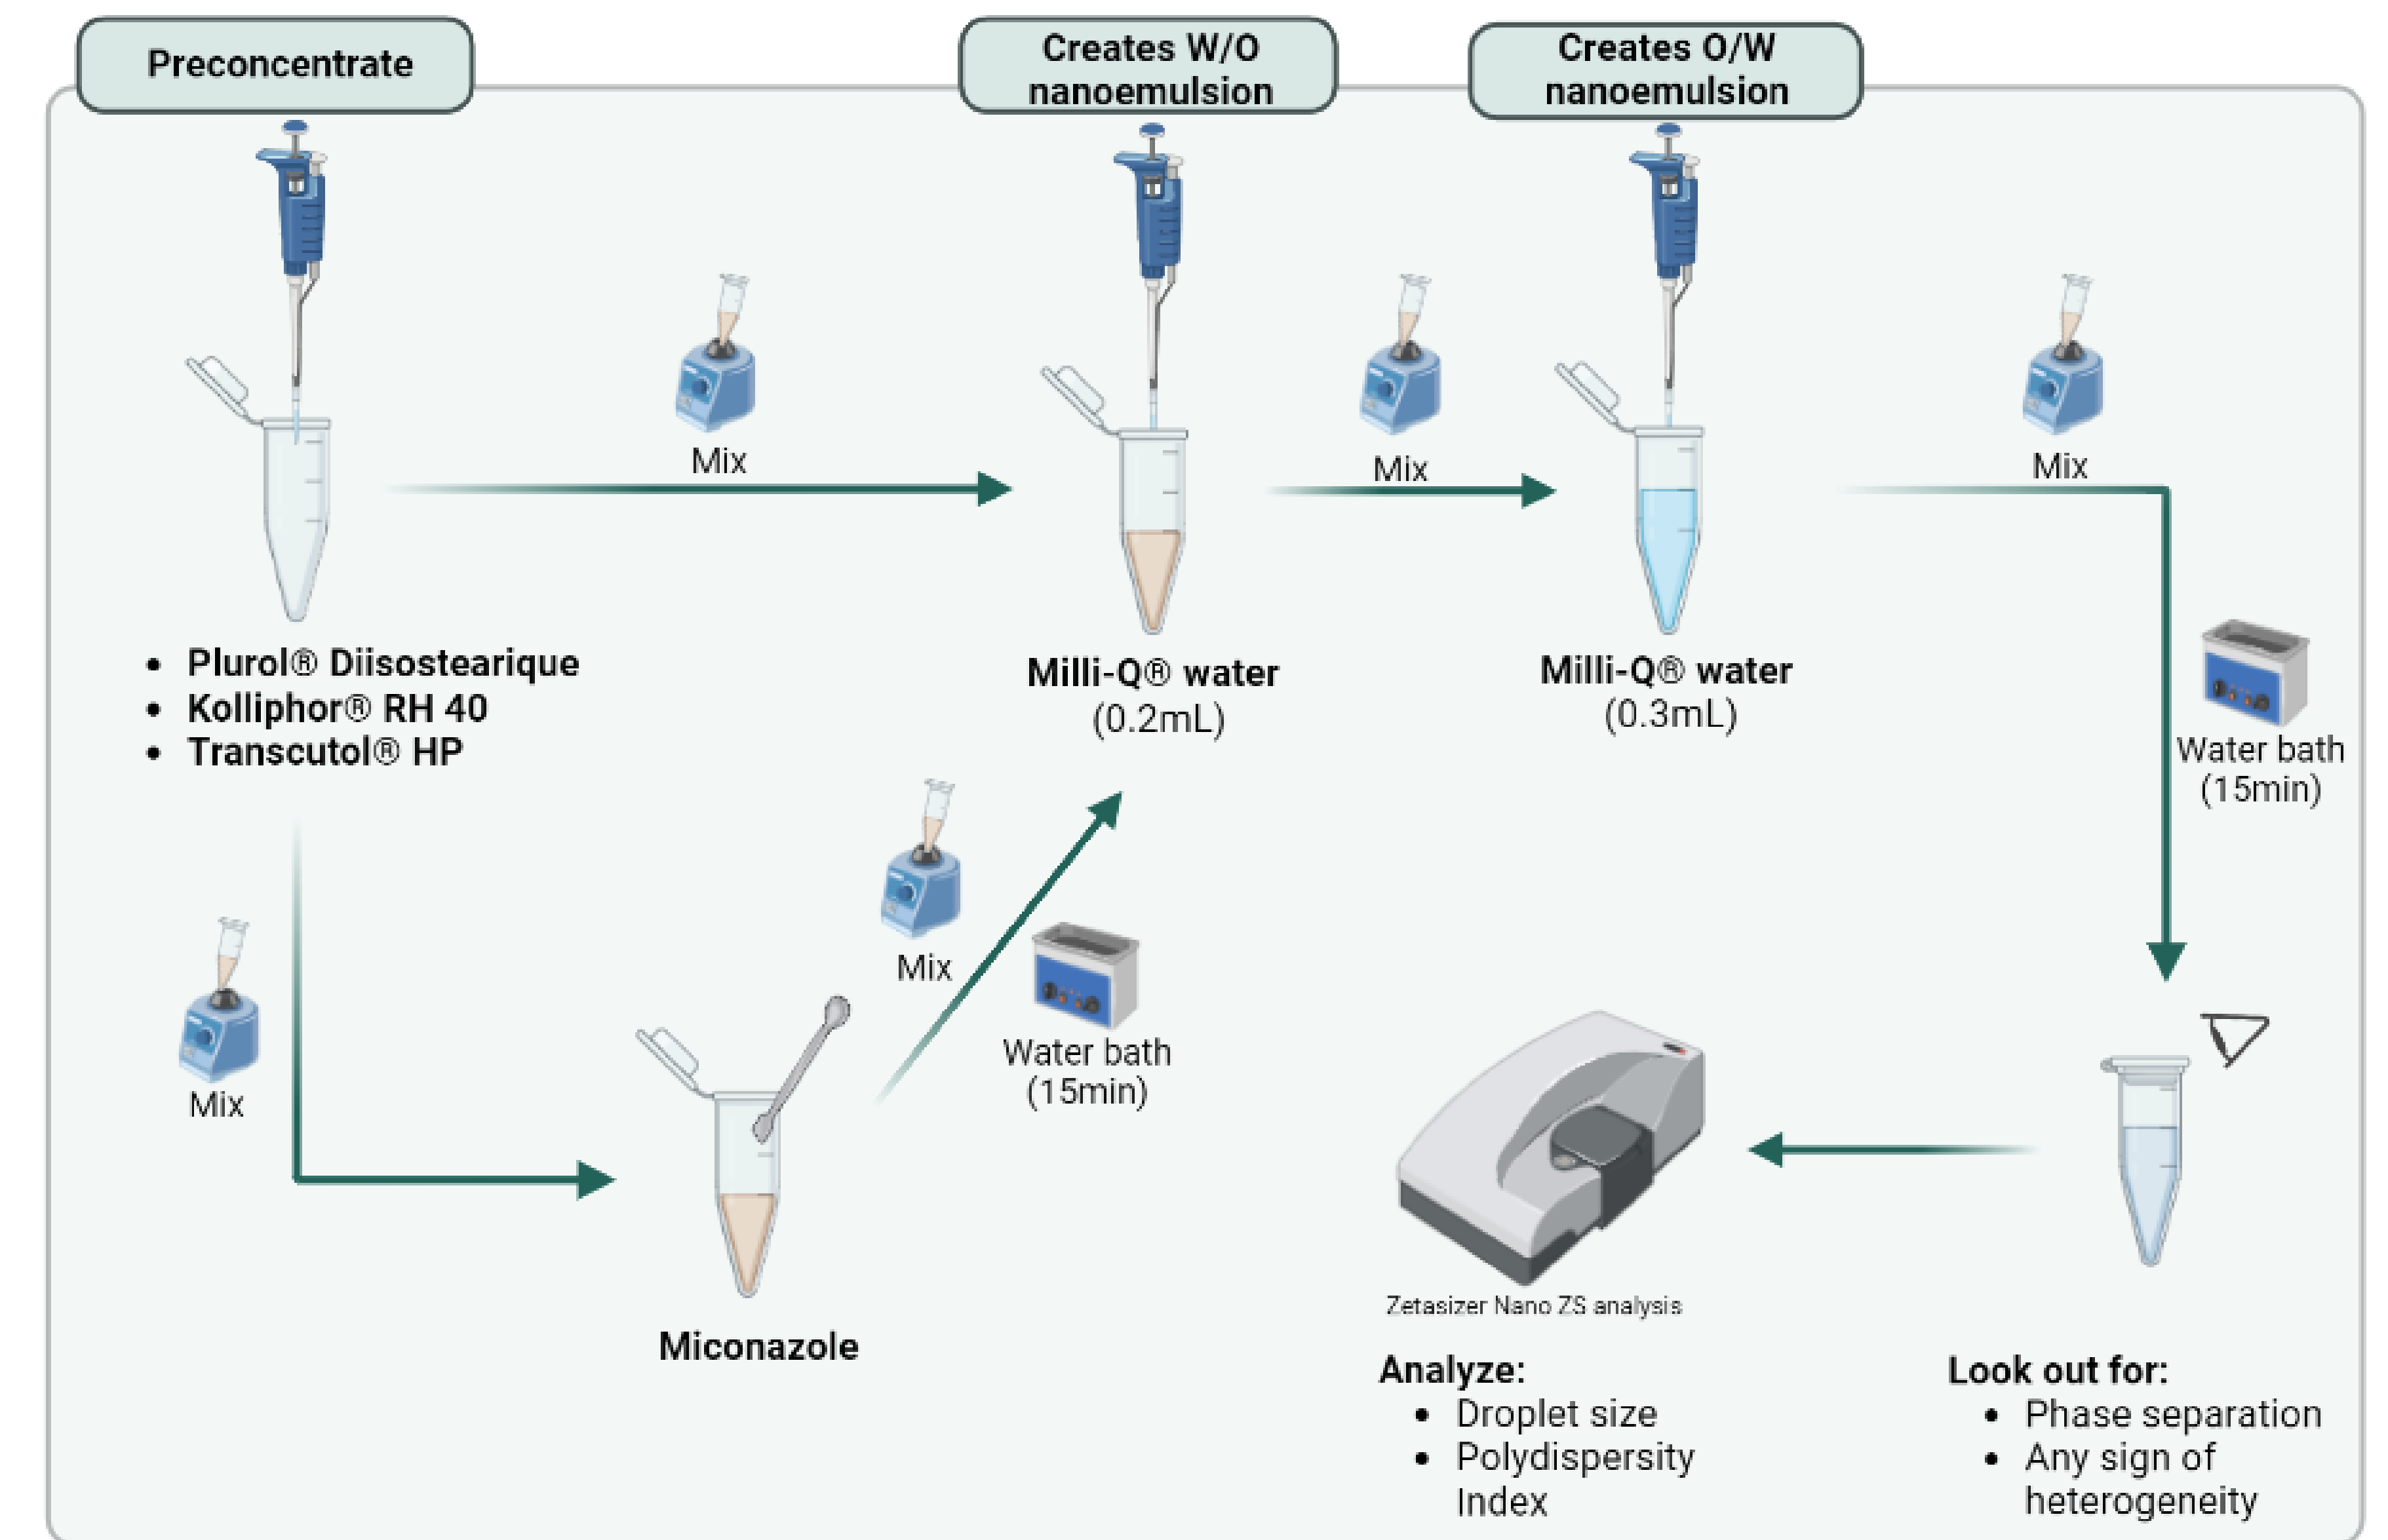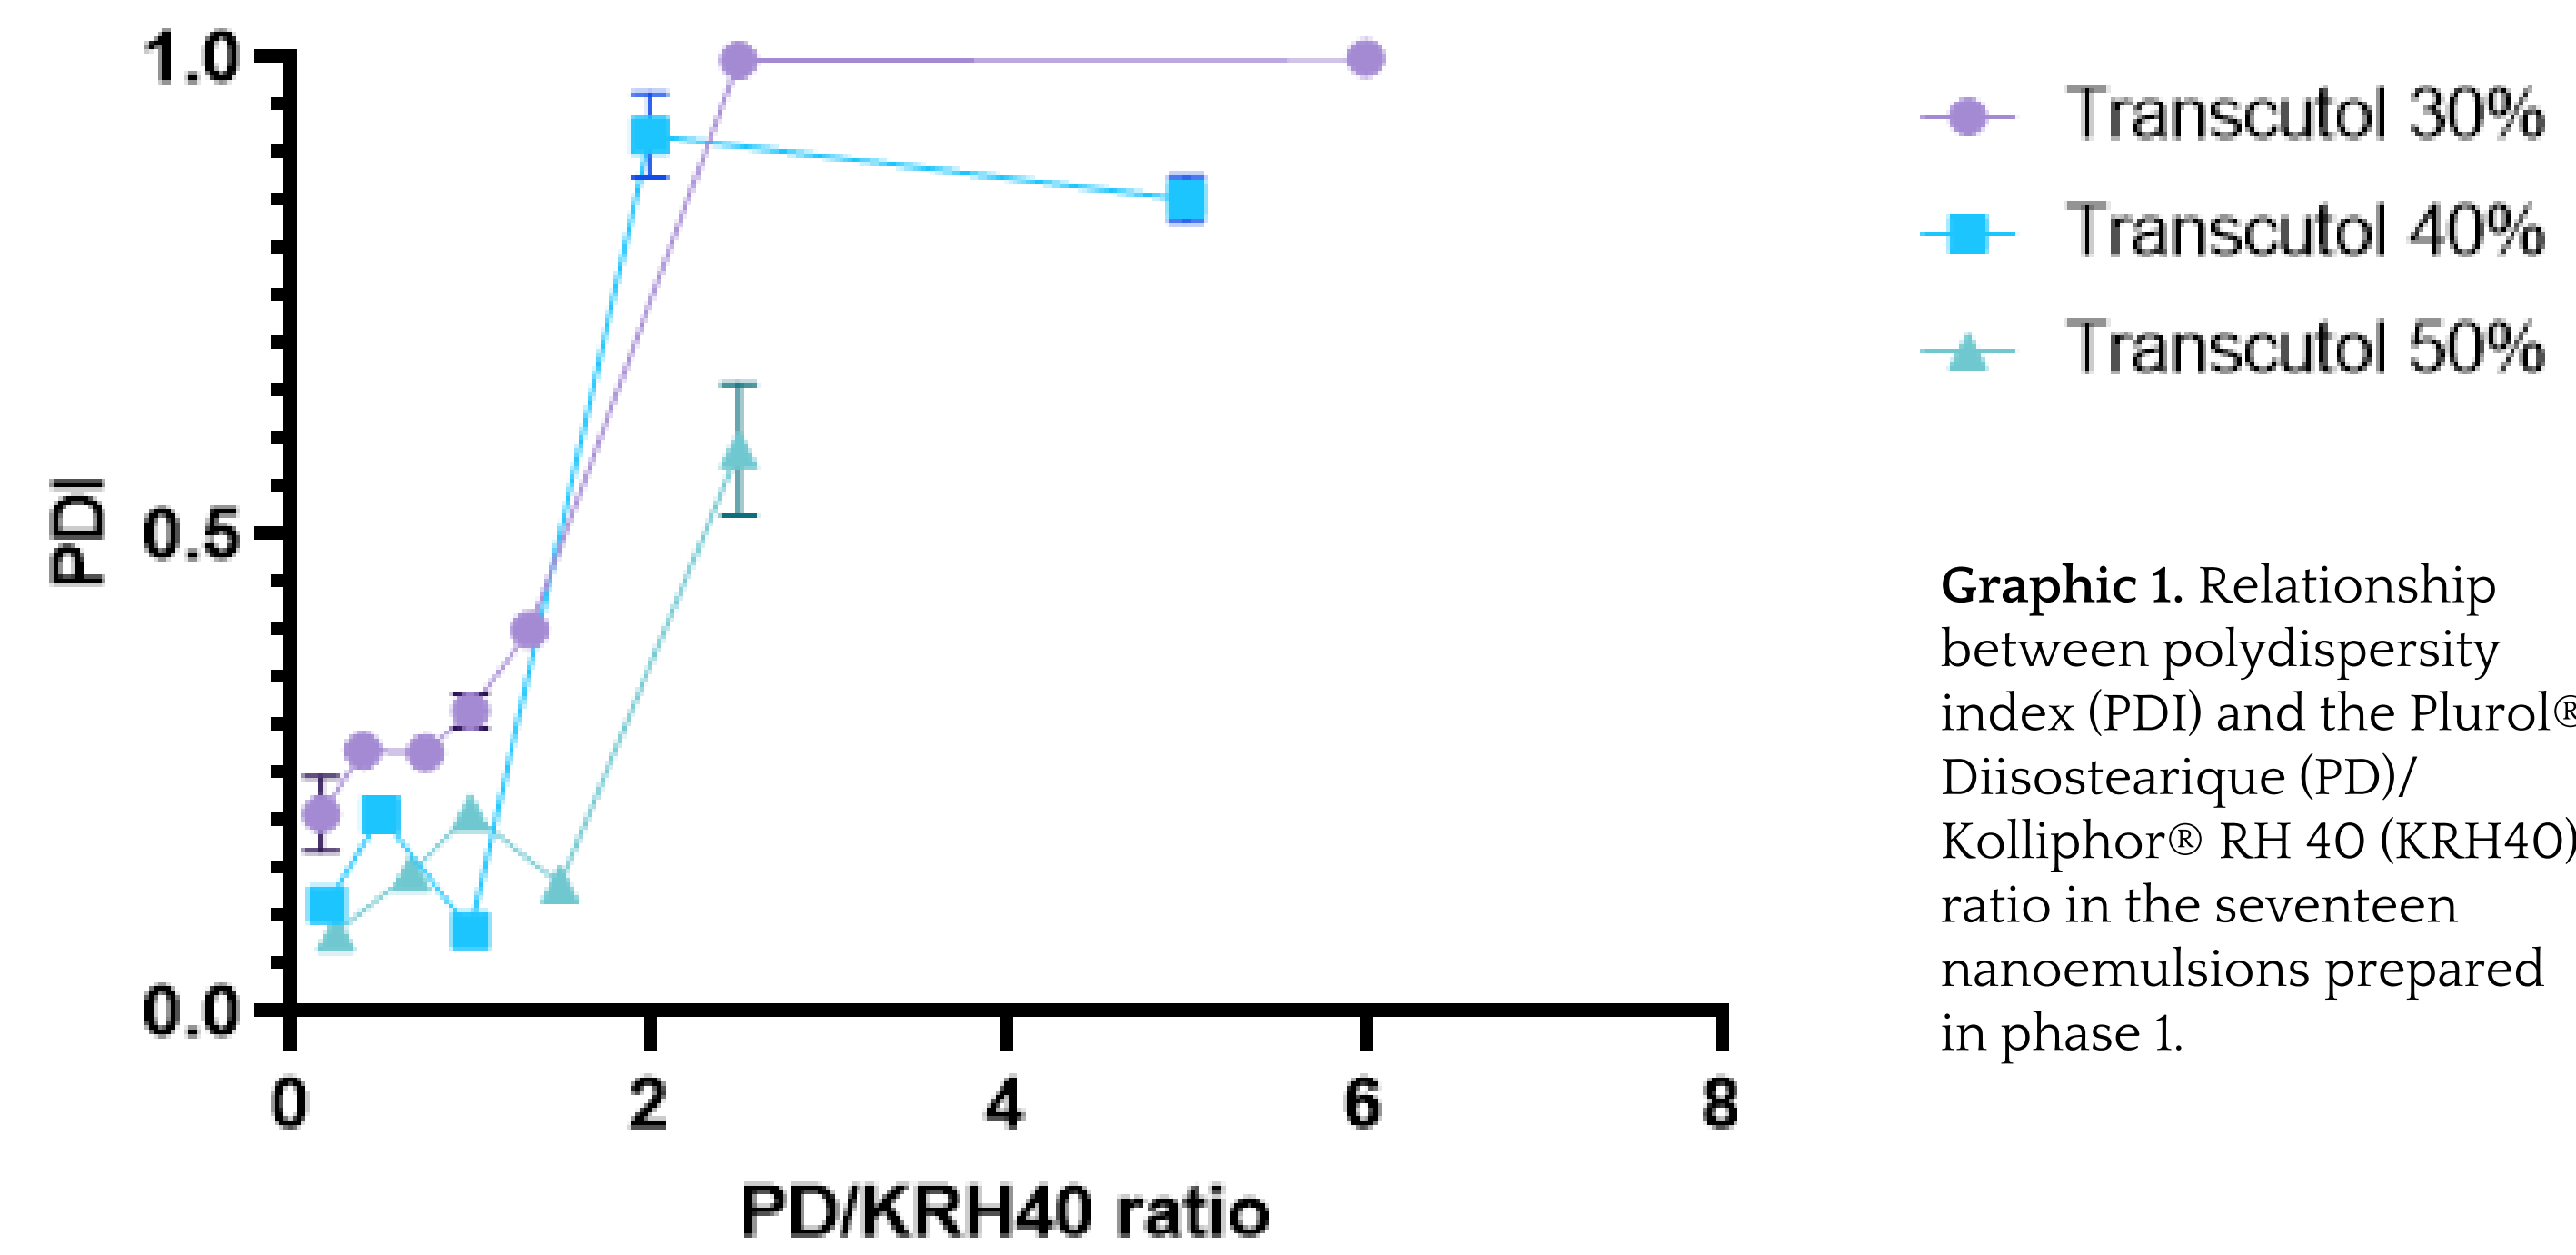

**Graphic 1.** Relationship between polydispersity index (PDI) and the Plurol® Diisostearique (PD)/Kolliphor® RH 40 (KRH40) ratio in the seventeen nanoemulsions prepared in phase 1.

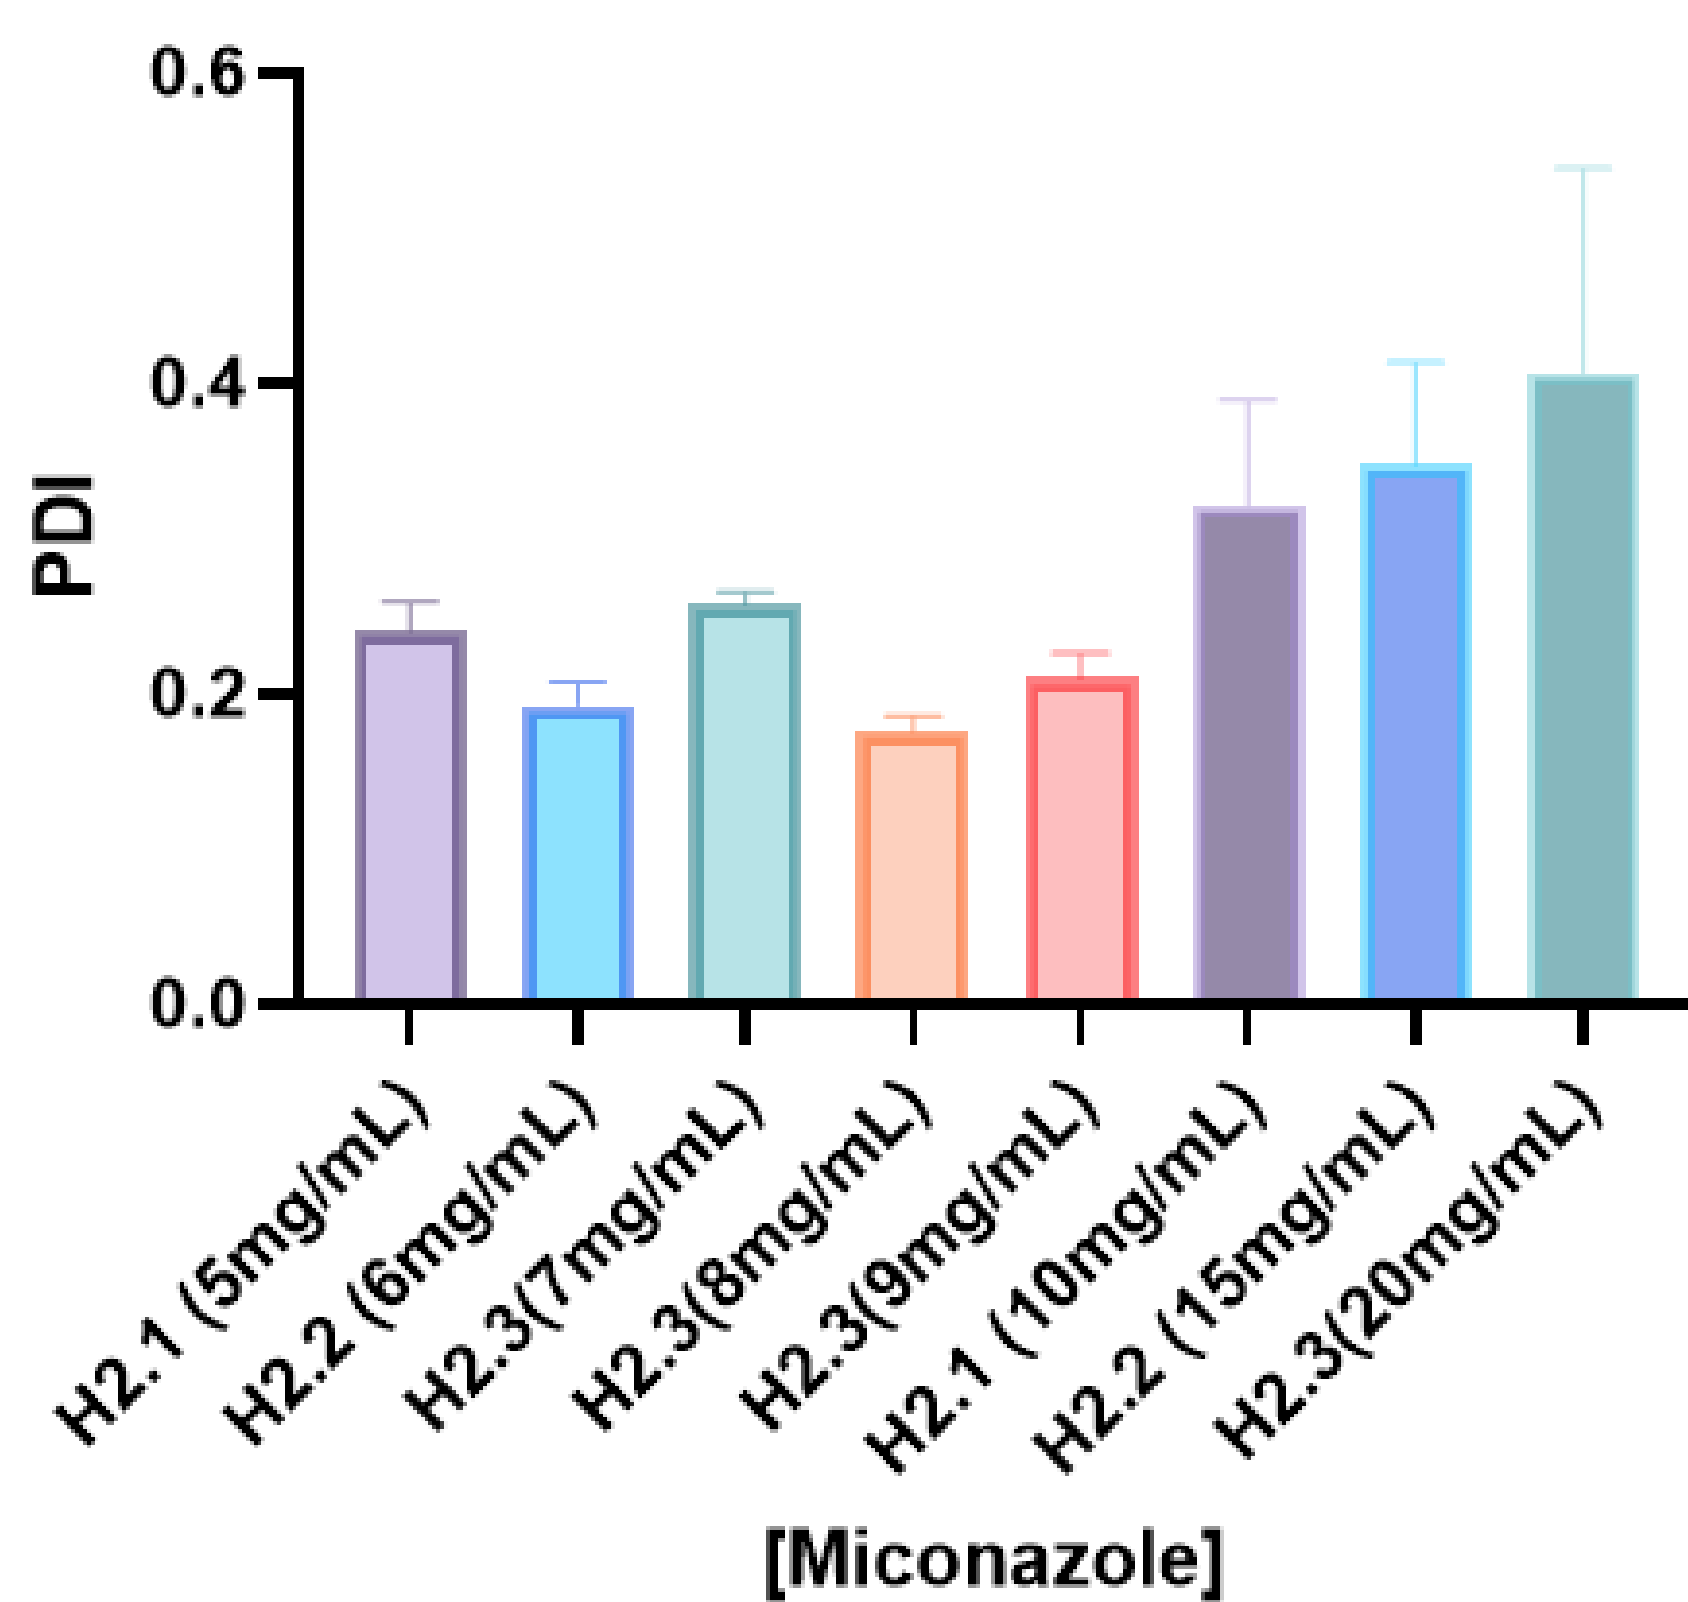

**Graphic 2.** Mean polydispersity index of nanoemulsions with different miconazole concentrations (mg/mL).

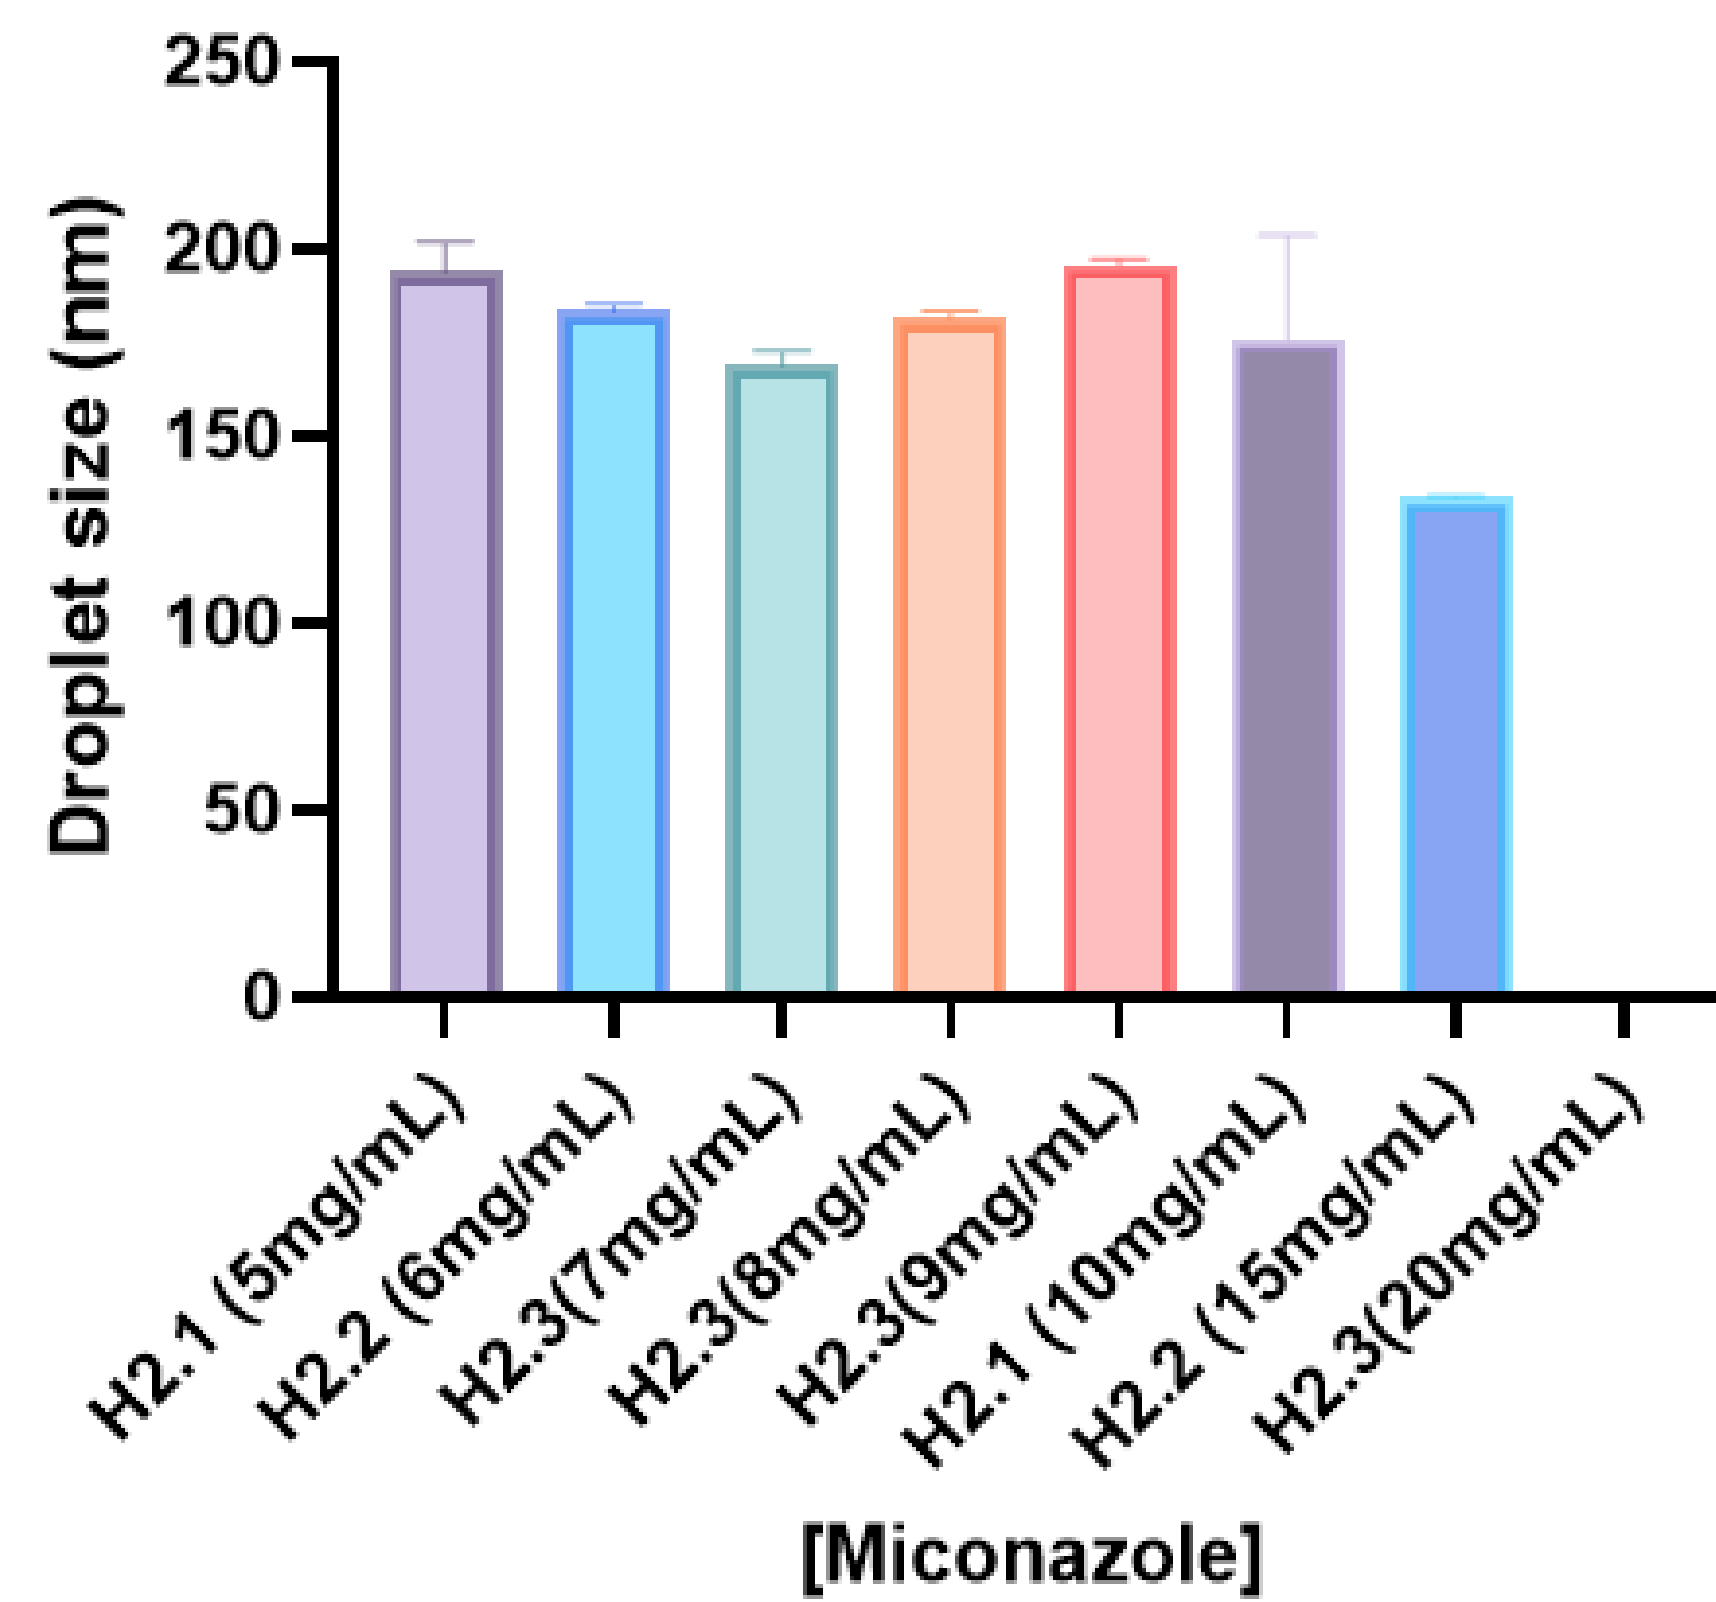

**Graphic 3.** Mean droplet size of nanoemulsions with different miconazole concentrations (mg/mL).

We consider the formulations to maintain good characteristics if miconazole is solubilized and the nanoemulsion keeps:

**PDI < 0.300**  
**Droplet size between 100 and 200 nm**

Considering the above information, just 1 of the 2 nanoemulsions (from phase 1) had good characteristics.

**Solubility assays proved it was possible to have:**

**5-9 mg/mL [Miconazole] → Drug strength 11 795 times higher than the drug's water solubility**

## Conclusion

- It is possible to **develop nanoemulsions** with good characteristics and **high miconazole concentration**. It allows to greatly **increase miconazole solubility** when compared to water (up to 11 795 times).
- **This formulations could be useful for the treatment of melanoma**, as this drug has been shown to decrease the growth of this type of cancer cells at much lower concentrations.
- Future studies will include determination of viscosity, stability, *in vitro* drug release, *ex vivo* drug permeation and *in vitro* cytotoxicity in melanoma cells.

## References

- Almami, F., Hui, N., Radwan, A., Alkhatib, I., & Shalash, F. (2014). Potential of lipid nanoemulsion for drug delivery of chlorzoxazone. *Journal of Pharmaceutical Sciences*, 103(10), 2221-2227. <https://doi.org/10.1002/jps.23503>
- D'Acquafredda, D., Scatena, F., Giampietri, C., Marchetti, F., Fuciano, F., & Fuciano, A. (2019). Ion channel expression in human melanoma samples: In silico identification and experimental validation of molecular targets. *Cancers*, 11(5), 789. <https://doi.org/10.3390/cancers11050789>
- Diazari, C., Morge, C., Migon, G., Serpe, L., Marino, K., Cingolani, L., Ferraris, C., Molteni, S., Orsella, S., Cigloni, C., La Biaggi, E., Coroneo, S., Di Stefano, U., & Battaglia, L. (2020). Nanoemulsions as delivery systems for poly-chemotherapy aiming at melanoma treatment. *Cancers*, 12(5), 1505. <https://doi.org/10.3390/cancers12051505>
- Elmehrik, N., Kati, A. M., Cheloufi, F., Mohamed, A. T., Khatib, E. I., Elmehrik, A., & You, Y. S. (2015). Nanoemulsion and Nanomel as a Topical Formulation Related paper. *Preprint*. <https://arxiv.org/abs/1508.00000>
- Elmehrik, N., Kati, A. M., Cheloufi, F., Mohamed, A. T., Khatib, E. I., Elmehrik, A., & You, Y. S. (2015). Nanoemulsion and Nanomel as a Topical Formulation Related paper. *Preprint*. <https://arxiv.org/abs/1508.00000>
- Levinská, A., Domaláková, M., Janová, A., & Lukavská, M. (2020). Nanoemulsion stabilized by self-assembly of liposomes as a multifunctional, custom-designed smart delivery system. *Pharmaceutics*, 12(10), 1-21. <https://doi.org/10.3390/pharmaceutics12100953>
- Mishra, H., Mishra, P. K., Puri, A., Jha, M., Jha, Z., & Talwar, S. (2016). Melanoma treatment: from conventional to nanotechnology. *In Journal of Cancer Research and Clinical Oncology* (Vol. 144, Issue 12, pp. 2283-2303). Springer Verlag. <https://doi.org/10.1007/s00261-016-0706-1>
- RASTRELLI MARCO, TROPÉA SAVERIA, ROSSI CARLO RICCARDO, & ALABAC MARCO. (2014). Melanoma: Epidemiology, Risk Factors, Pathogenesis, Diagnosis and Classification. [https://doi.org/10.1007/978-94-007-6000-0\\_10](https://doi.org/10.1007/978-94-007-6000-0_10)
- Sandhu, J., Bhattacharya, S., Shah, R., & Prasad, B. G. (2022). The recent development of topical nanoparticles for anti-infective skin cancer. *In Adv Jge* (Vol. 15, Issue 1, pp. 843-849). Taylor and Francis Ltd. <https://doi.org/10.1080/2689593.2022.2103922>
- Tan, T., Rades, T., & Miller, A. (2018). Formulation of self-nanoemulsifying drug delivery systems containing monosyl phosphatidylcholine and Kolliphor® RH40 using experimental design. *Asian Journal of Pharmaceutical Sciences*, 13(6), 536-545. <https://doi.org/10.1016/j.ajps.2017.06.009>
- Zeng, H., Li, J., Hua, K., Wu, Y., Chen, H., & Ning, Z. (2022). Melanoma and Nanotechnology-Based Treatment. *In Frontiers in Oncology* (Vol. 12). Frontiers Media SA. <https://doi.org/10.3389/fonc.2022.819105>
- Miconazole. Uses, Interactions, Mechanism of Action | DrugBank Online. (2005) <https://pubchem.ncbi.nlm.nih.gov/compound/Miconazole>
